# Supplementary material for: Design of pyrrolo[2,3- d ]pyrimidine-endoperoxide hybrids as first-in-class dual degraders of cyclin D1/3 and CDK4/6 with potent antiproliferative effects
Source: Royal Society of Chemistry journal article supplement (doi:10.1039/d5ob00501a), 2025-01-01
Supplement: d5ob00501a2.pdf [file d5ob00501a2.pdf]

Supplementary Information (SI) for Organic & Biomolecular Chemistry.  
This journal is © The Royal Society of Chemistry 2025

### Supplementary Information

#### Design of Pyrrolo[2,3-d]Pyrimidine-Endoperoxide Hybrids as First-in-Class Dual Degraders of Cyclin D1/3 and CDK4/6 with Potent Antiproliferative Effects

Zhen Cui,<sup>a</sup> Yuanli Yang,<sup>a</sup> Changqi Wang,<sup>a</sup> Jiayi Zhu,<sup>a</sup> Haowei Jiao,<sup>a</sup> Lu Wang,<sup>b</sup> Silong Zhang,<sup>\*a,c</sup> Huan He,<sup>\*a,c</sup> and Hang Zhong<sup>\*a,c</sup>

*a. School of Pharmaceutical Sciences/ Guizhou Engineering Laboratory for Synthetic Drugs, Guizhou University, Guiyang, 550025, China.*

*b. Chemical Engineering Center, Guizhou University, Guiyang, 550025, China*

*c. Guizhou Provincial Key Laboratory of Innovation and Manufacturing for Pharmaceuticals, Zunyi Medical University, Zunyi, 563000, China*

*E-mail address:* hzhong\_gzu\_edu@126.com (H. Zhong)

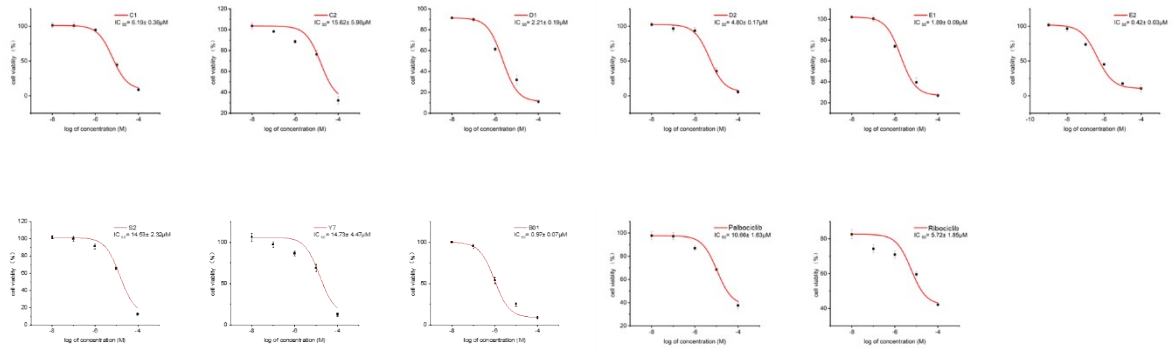

Fig. S1 Dose-response curve of target compound in T47D cells. (New)

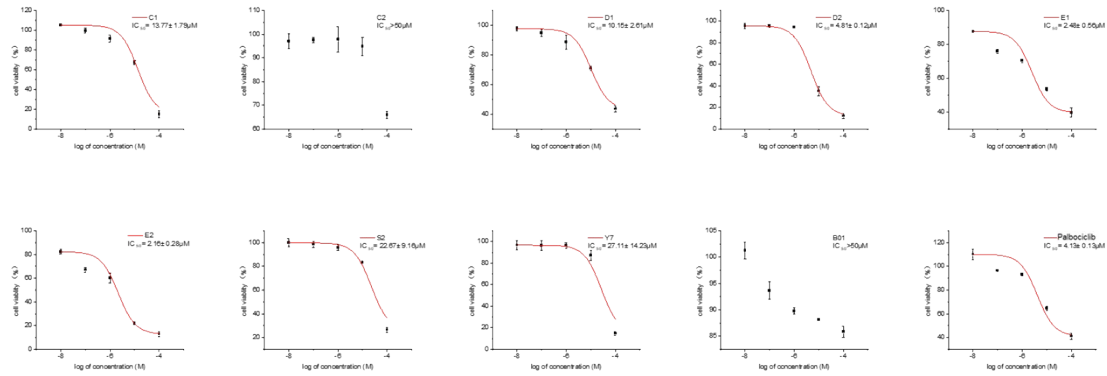

Fig. S2 Dose-response curve of target compound in MCF-7 cells. (New)

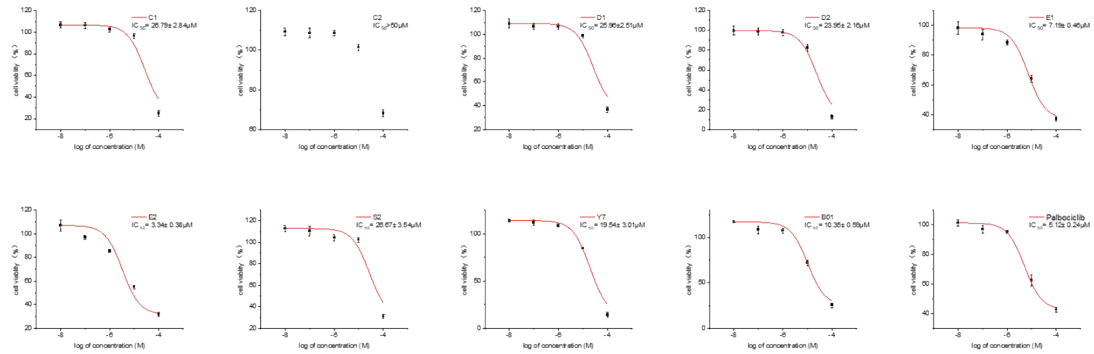

Fig. S3 Dose-response curve of target compound in MCF-10A cells. (New)

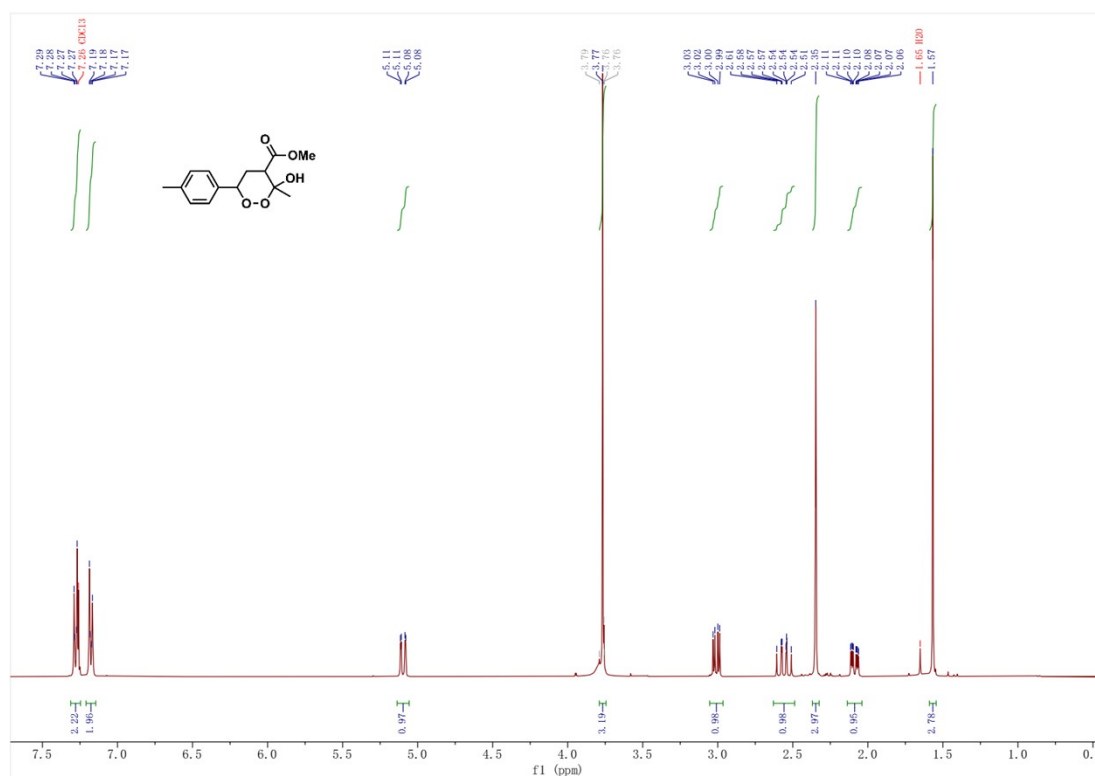

Fig. S4 <sup>1</sup>H NMR spectra of **a2**. (New)

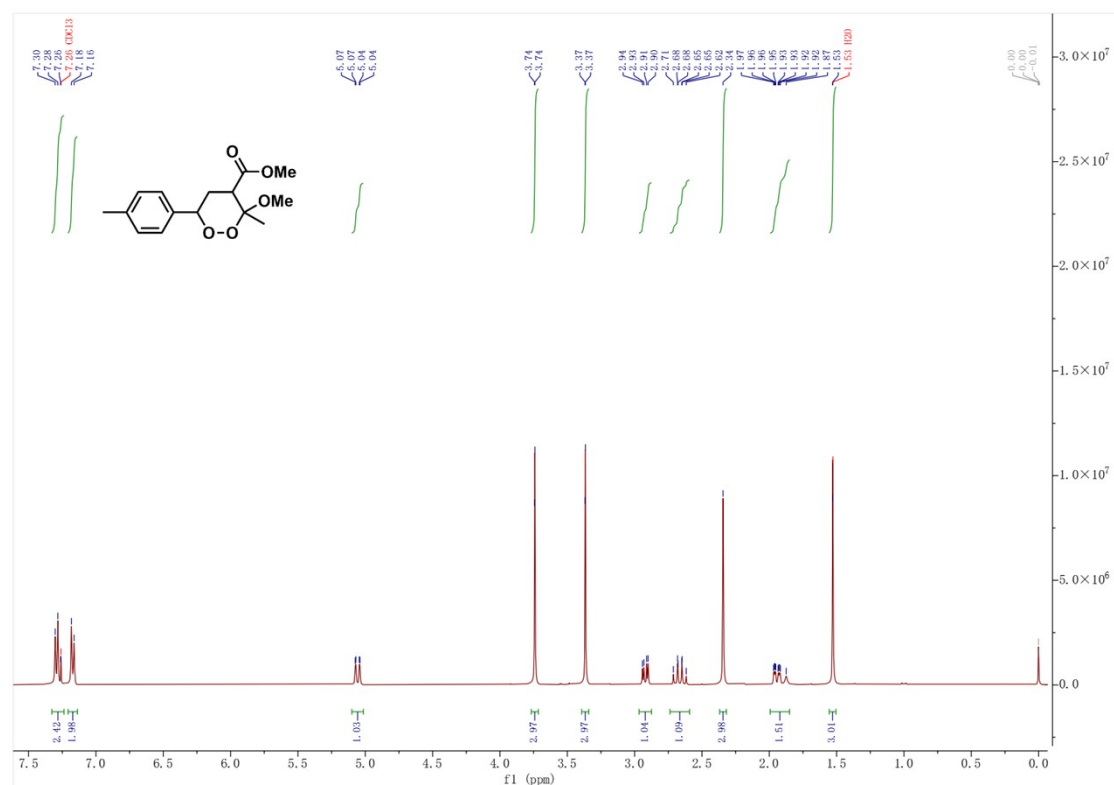

Fig. S5 <sup>1</sup>H NMR spectra of **a4**. (New)

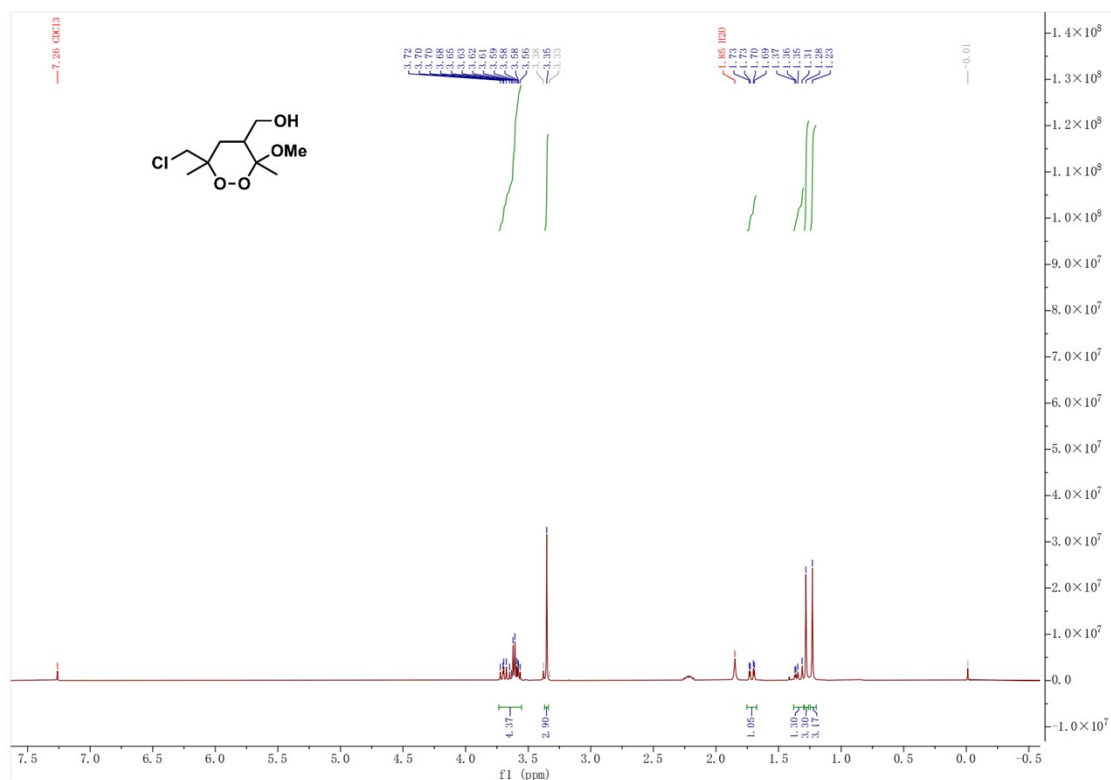

Fig. S6  $^1\text{H}$  NMR spectra of **a5**. (New)

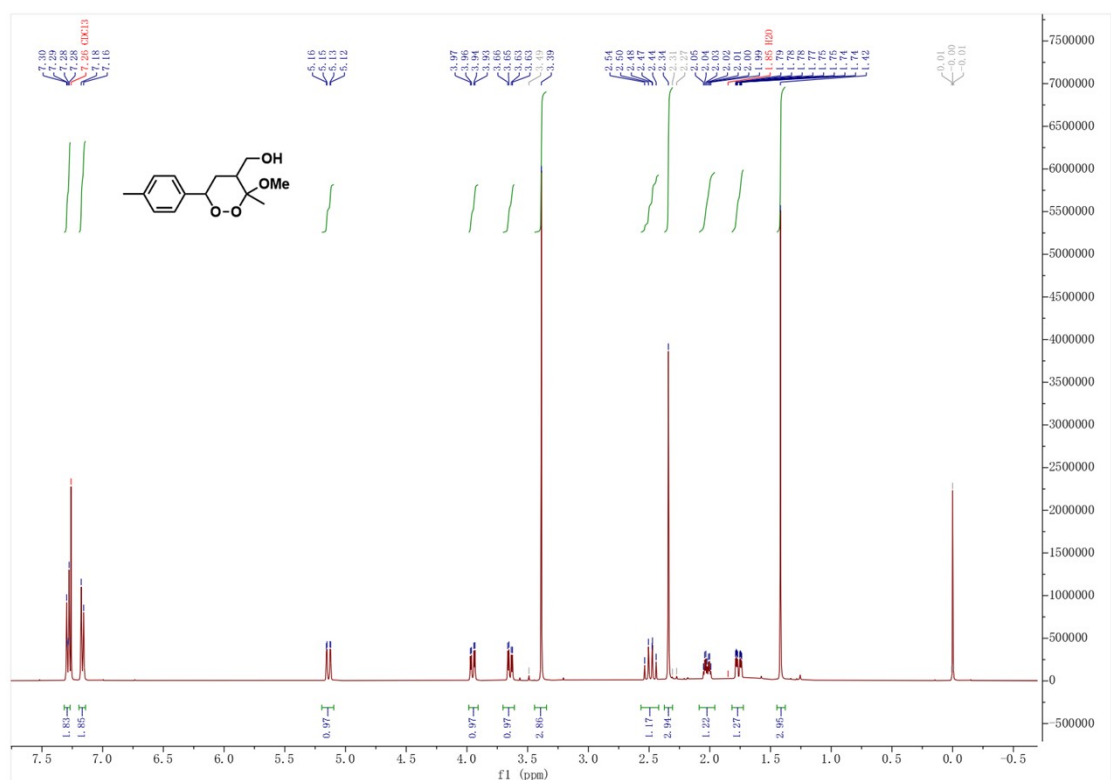

Fig. S7  $^1\text{H}$  NMR spectra of **a6**. (New)

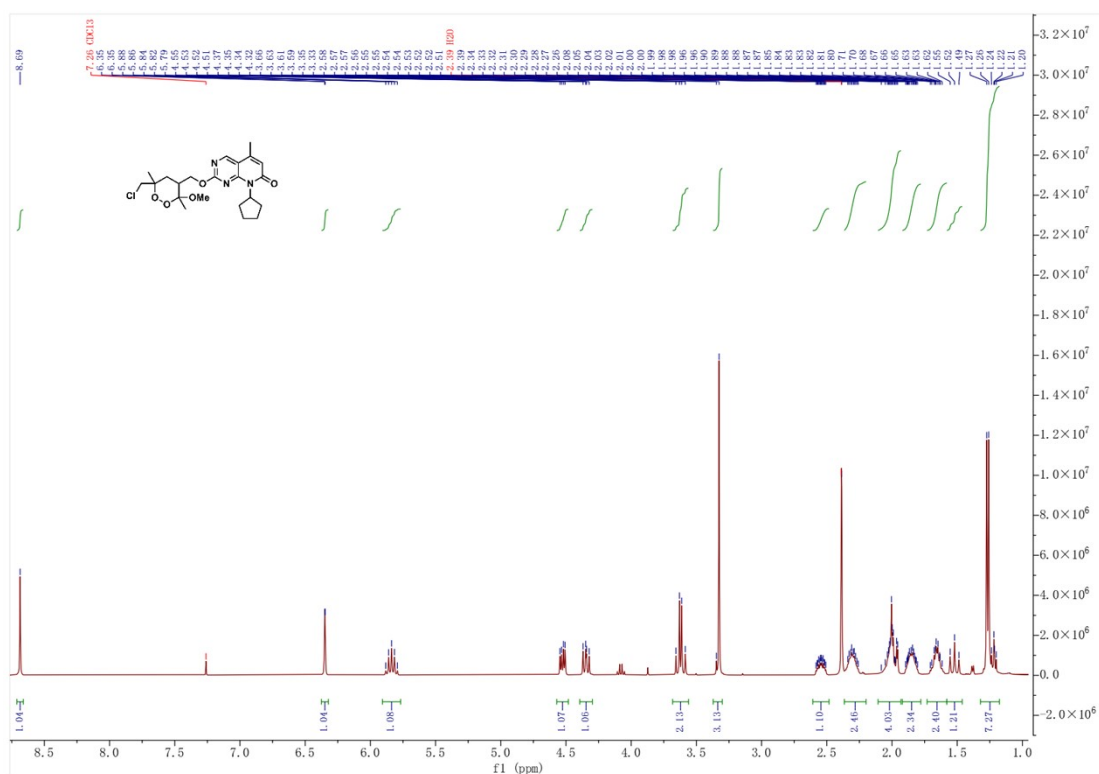

Fig. S8 <sup>1</sup>H NMR spectra of C1.

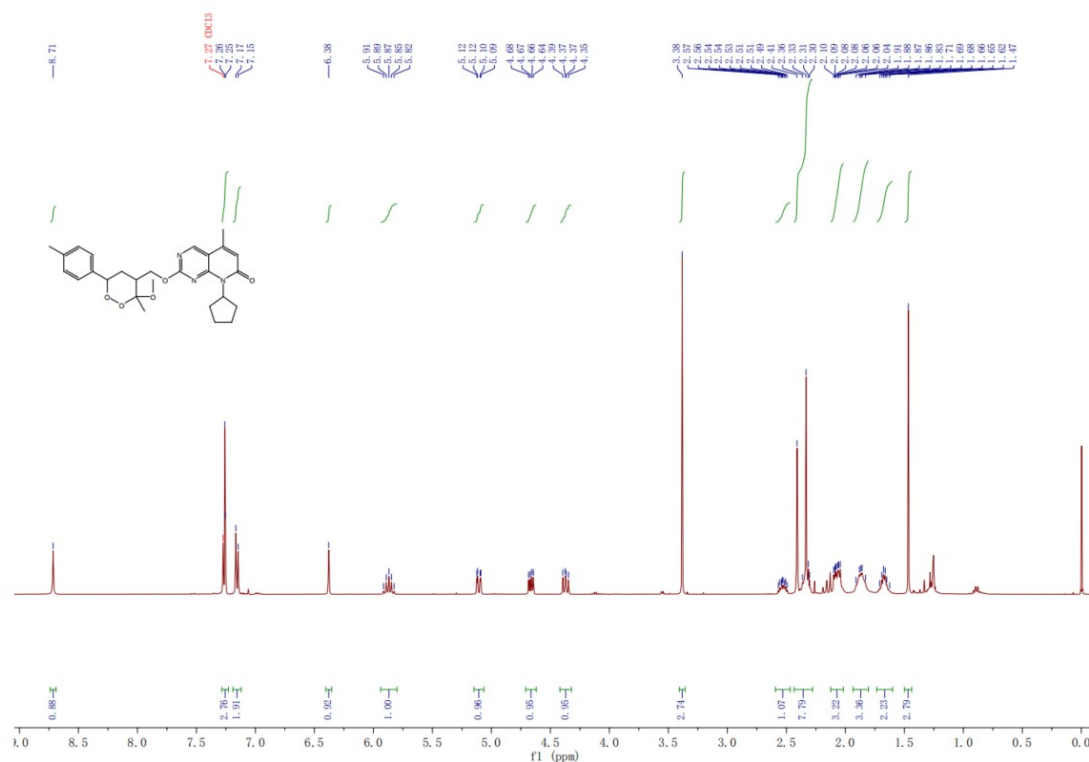

Fig. S9 <sup>1</sup>H NMR spectra of C2.

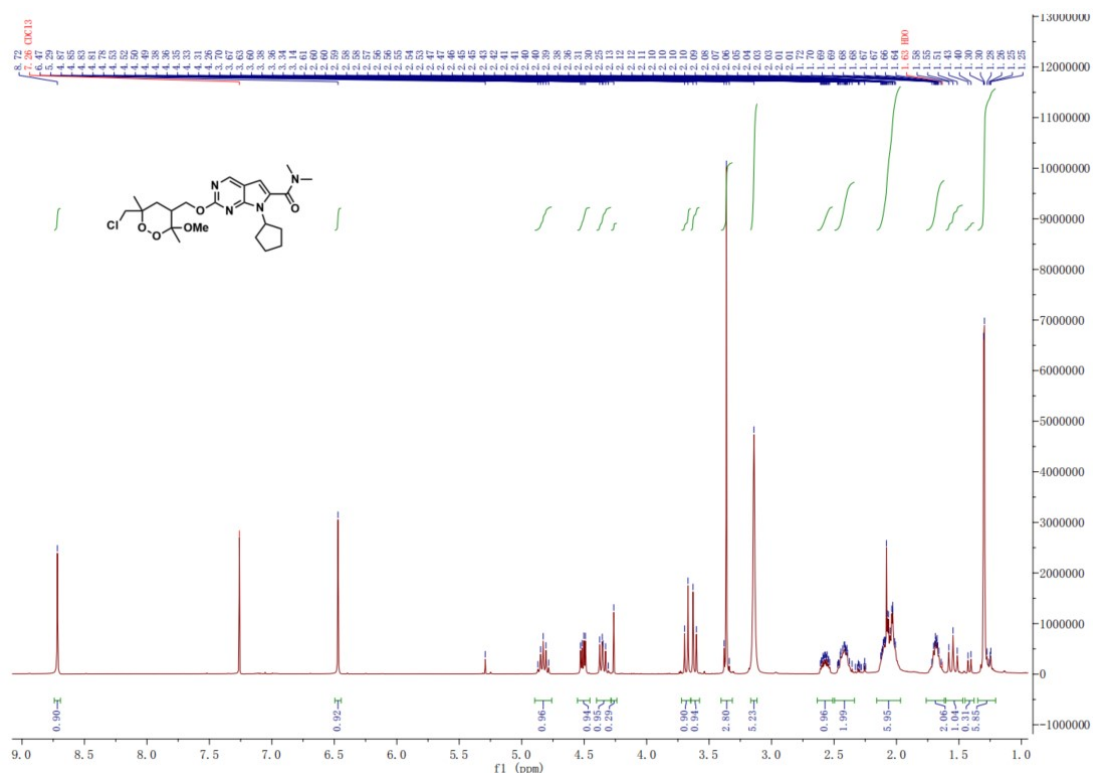

Fig. S10 <sup>1</sup>H NMR spectra of D1.

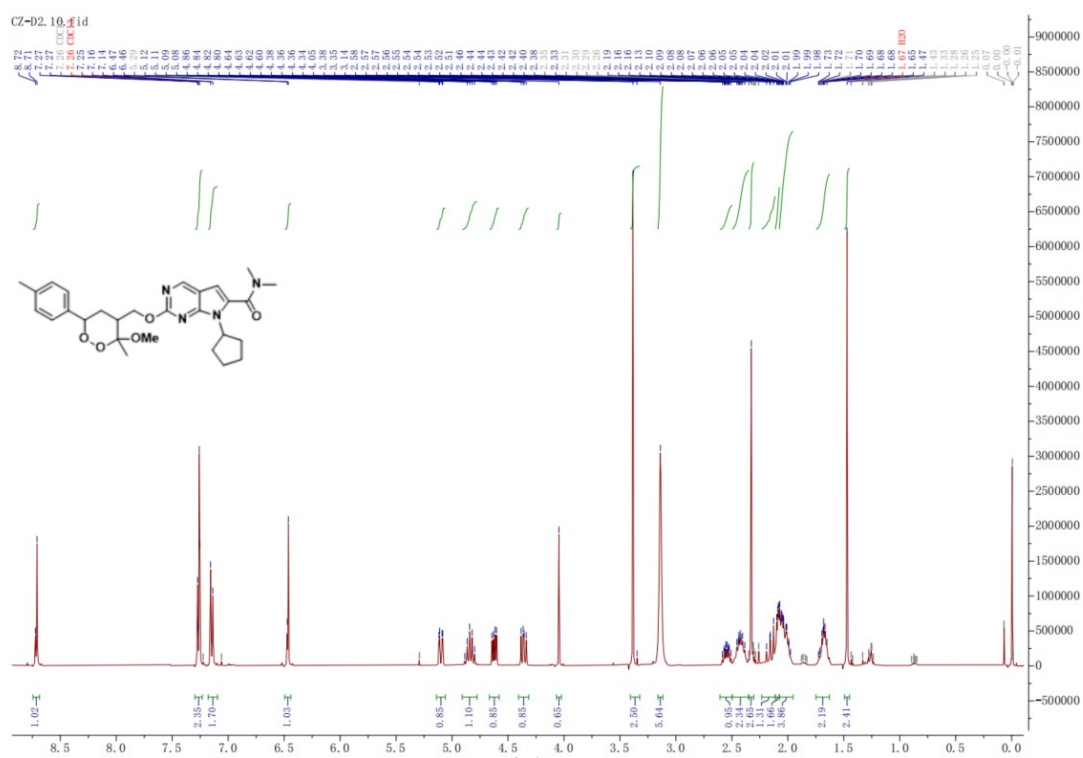

Fig. S11 <sup>1</sup>H NMR spectra of D2.

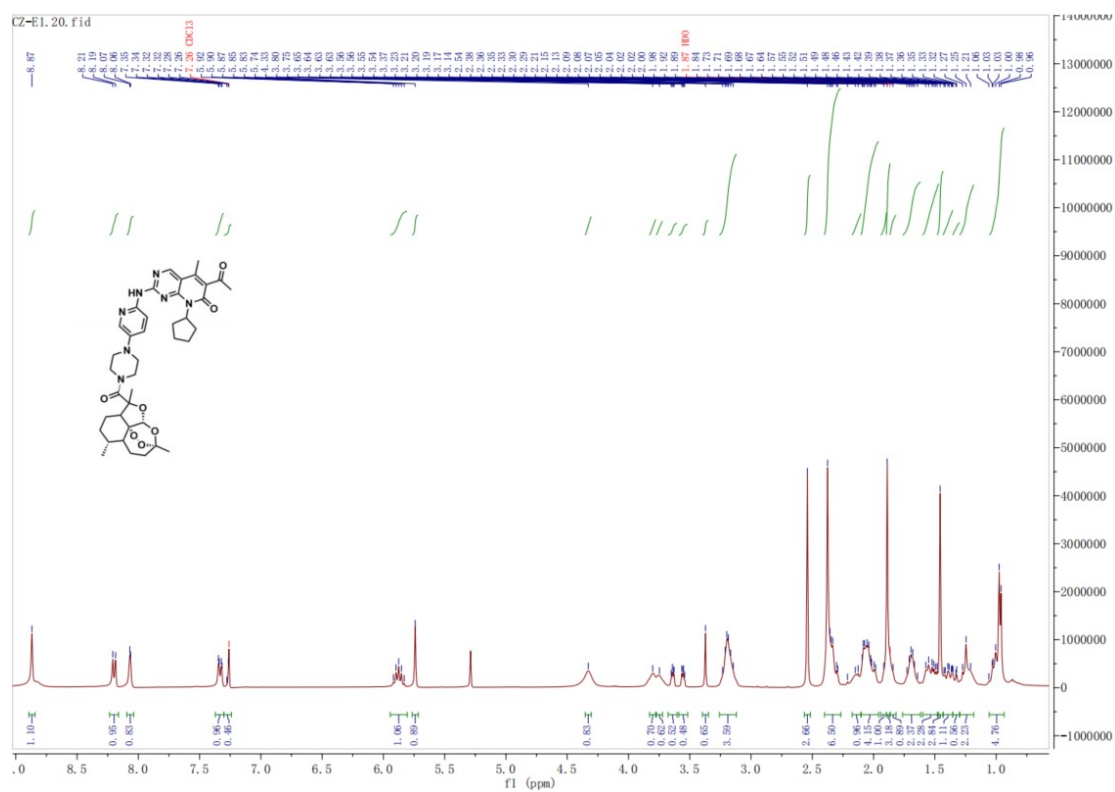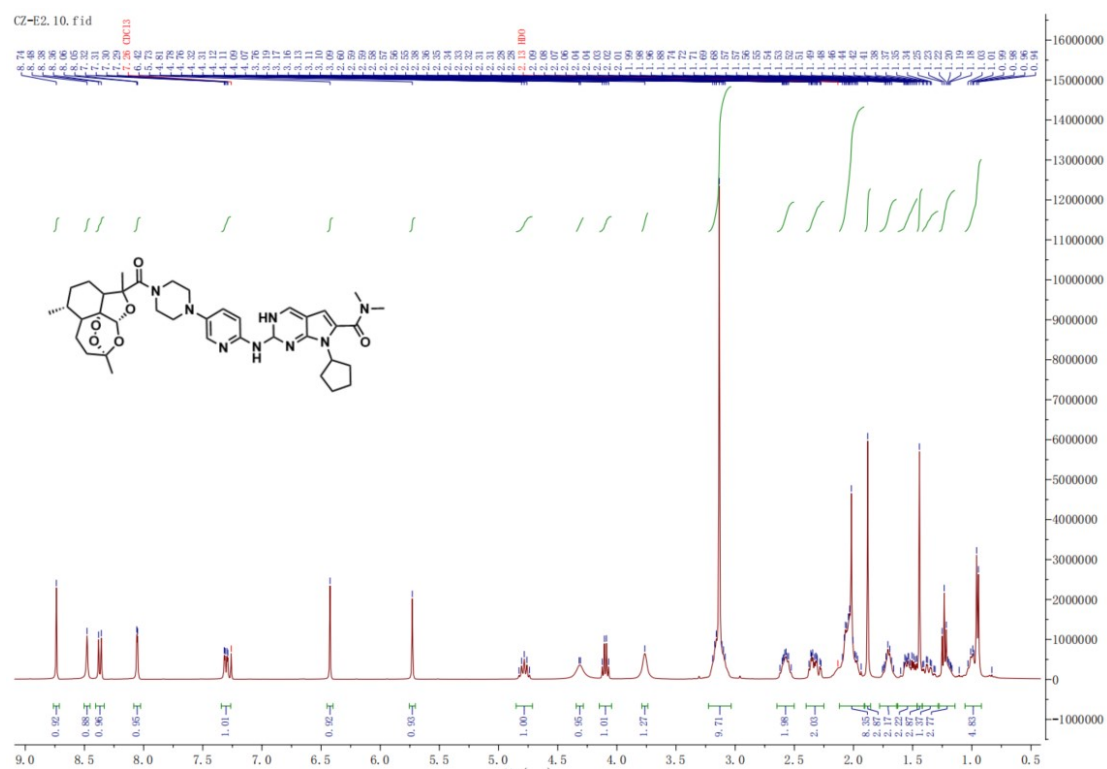

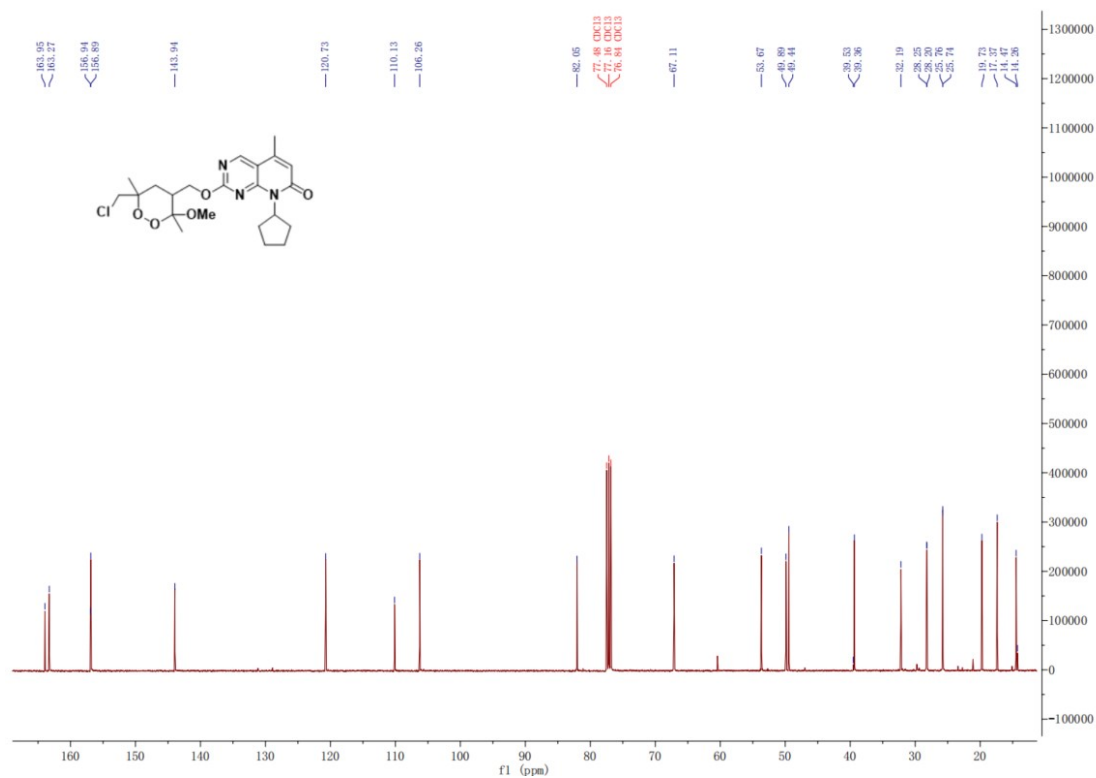

Fig. S14 <sup>13</sup>C NMR spectra of C1.

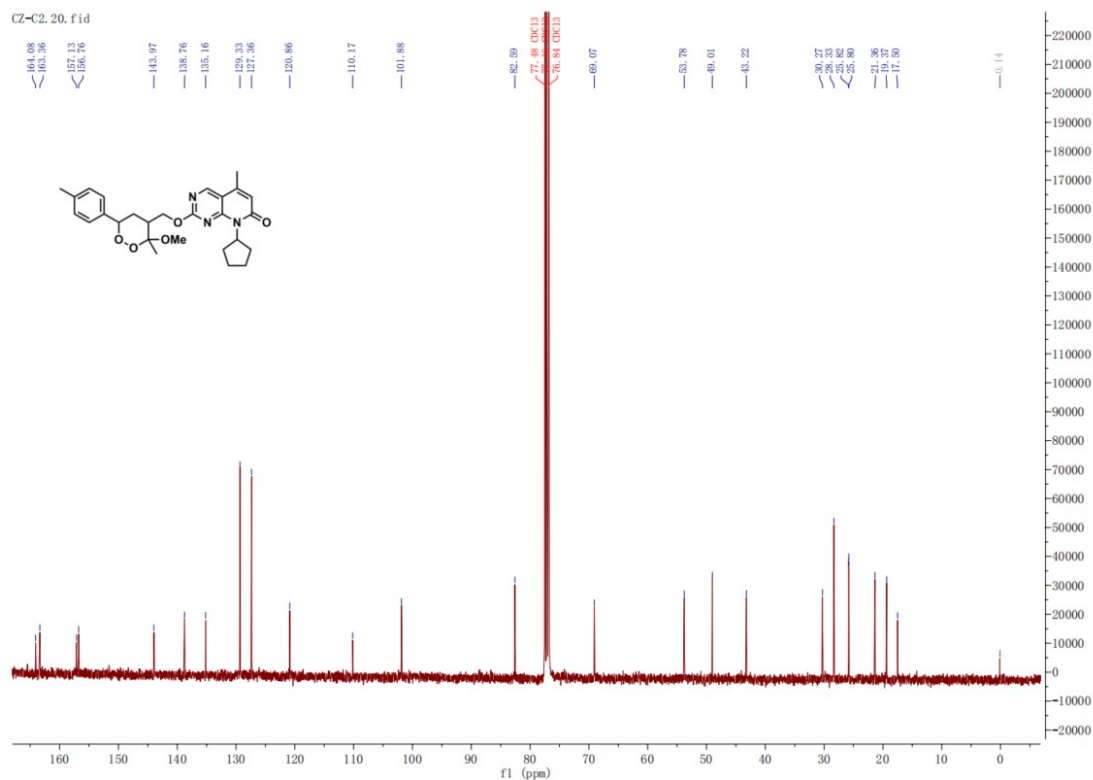

Fig. S15 <sup>13</sup>C NMR spectra of C2.



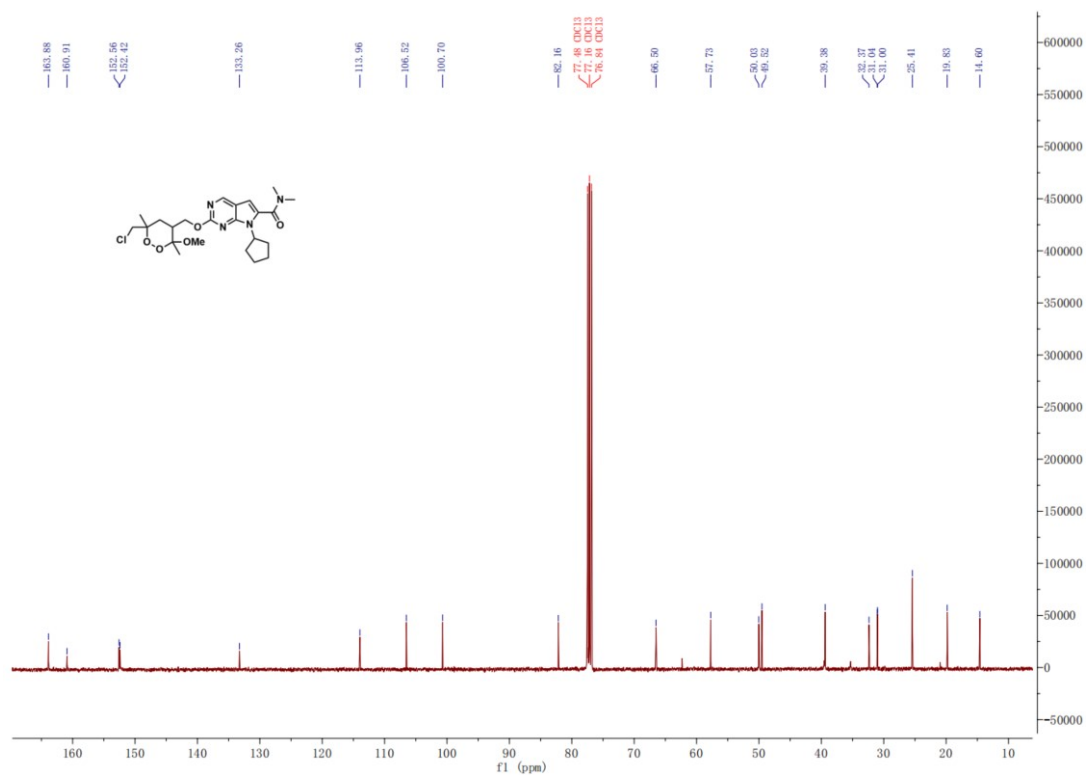

Fig. S16 <sup>13</sup>C NMR spectra of D1.

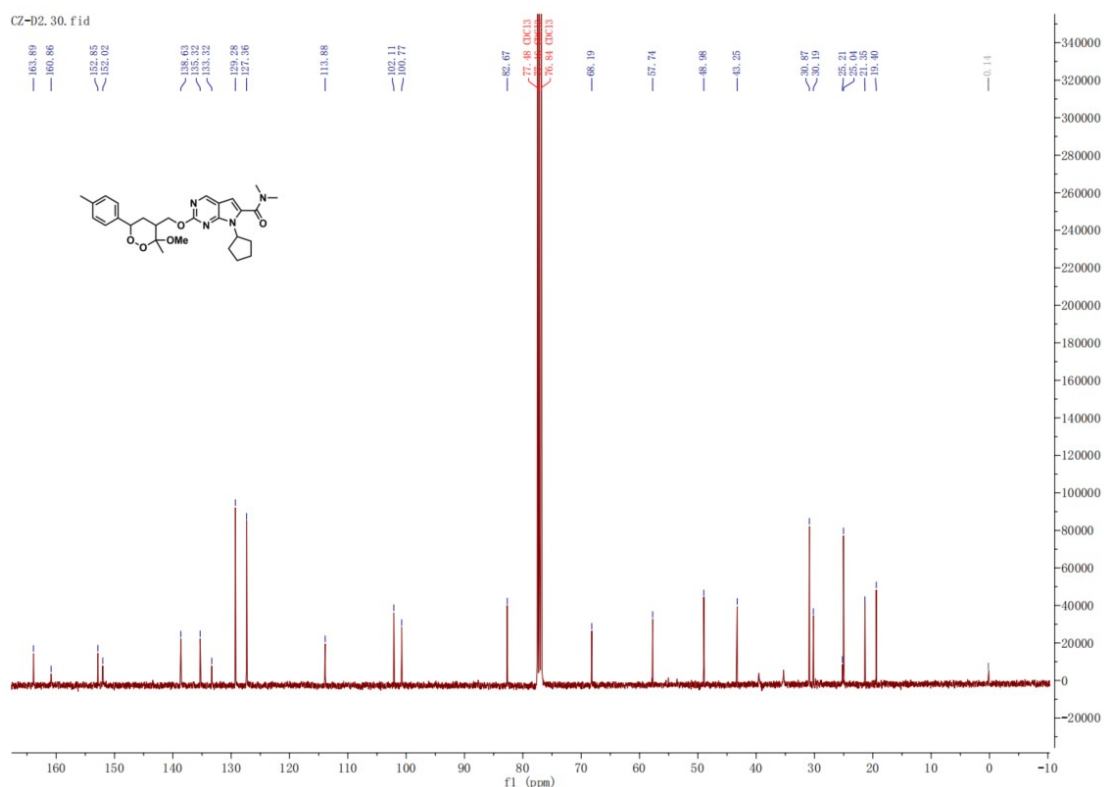

Fig. S17 <sup>13</sup>C NMR spectra of D2.

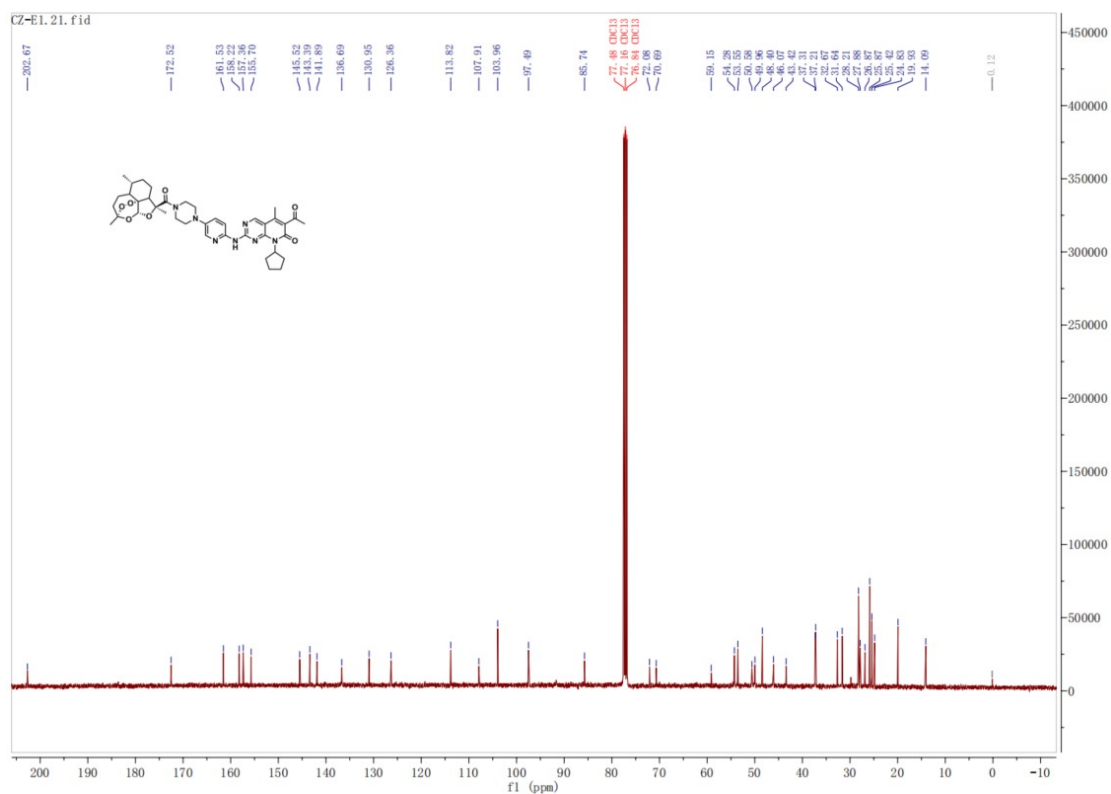

Fig. S18  $^{13}\text{C}$  NMR spectra of E1.

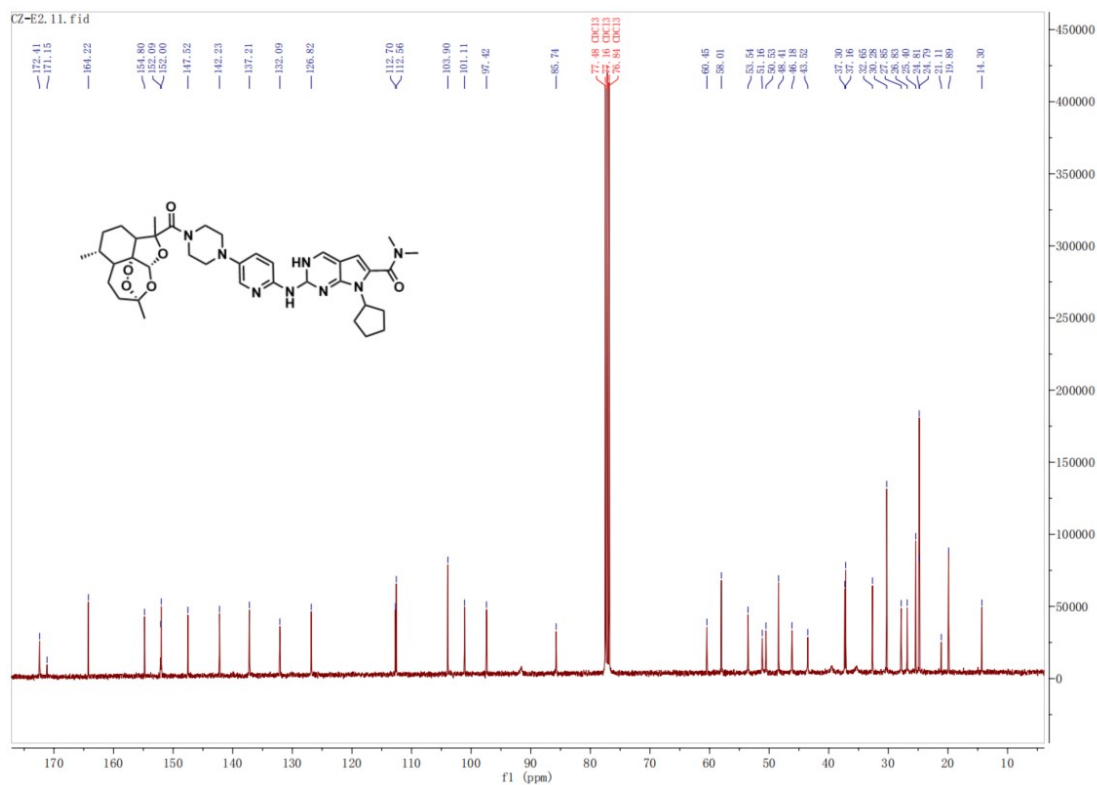

Fig. S19  $^{13}\text{C}$  NMR spectra of E2.

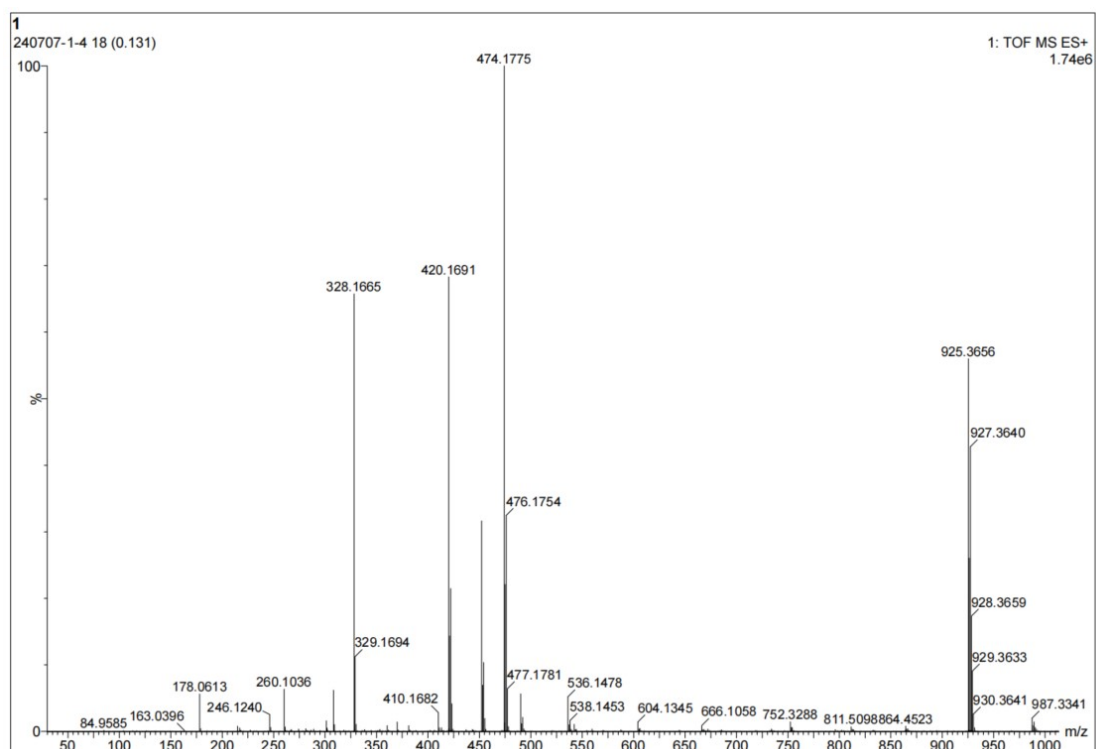

Fig. S20 HRMS spectra of C1

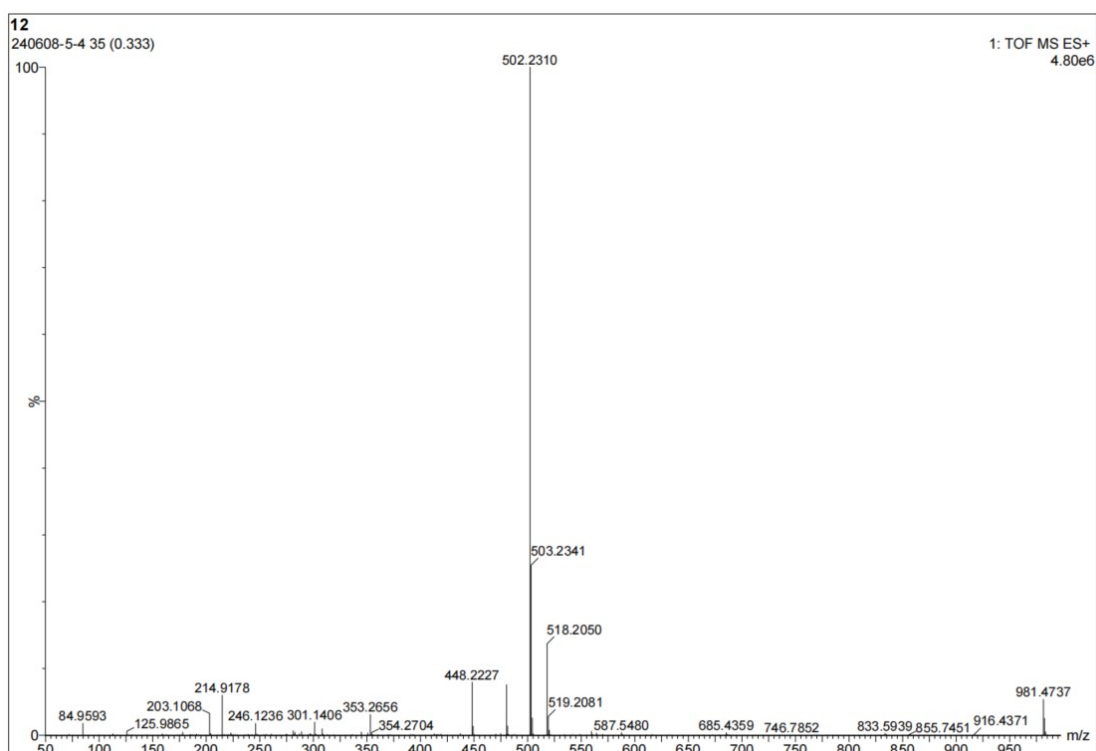

Fig. S21 HRMS spectra of C2

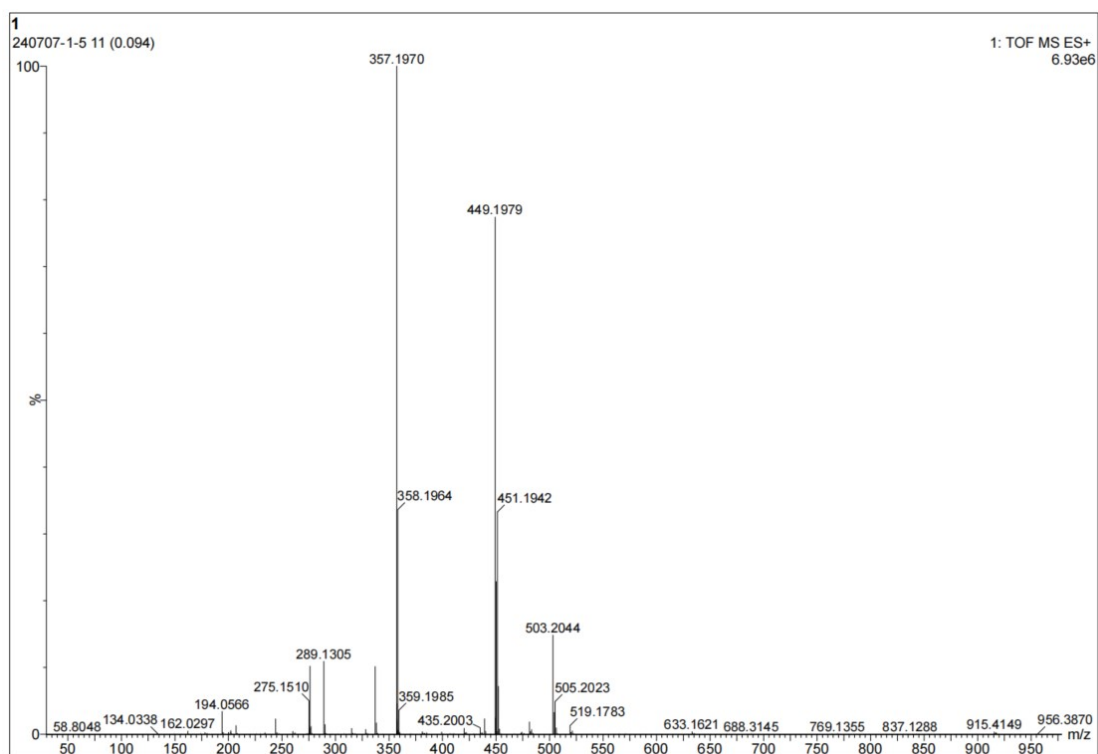

Fig. S22 HRMS spectra of **D1**

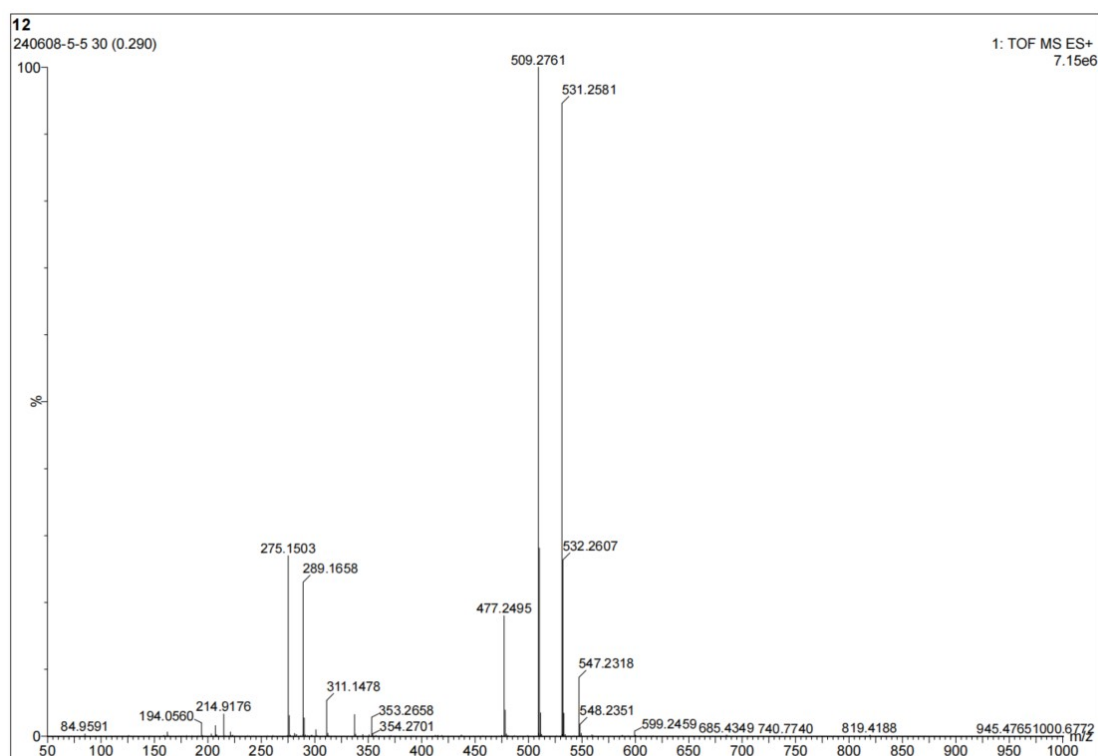

Fig. S23 HRMS spectra of **D2**

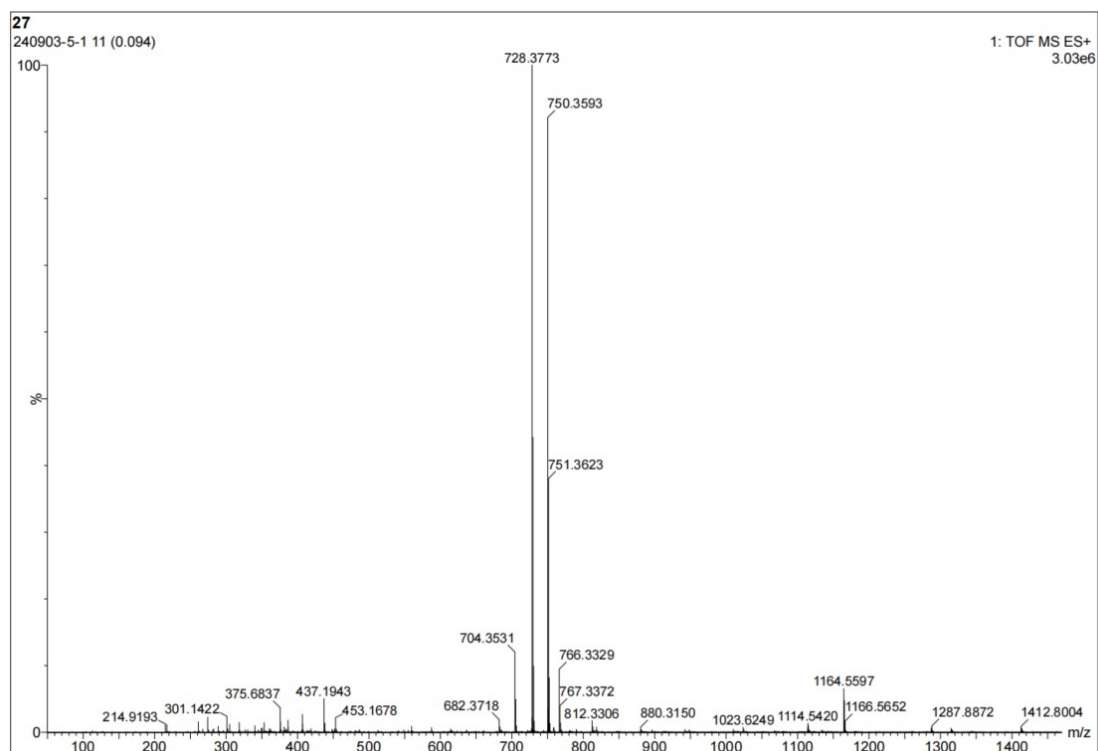

Fig. S24 HRMS spectra of **E1**

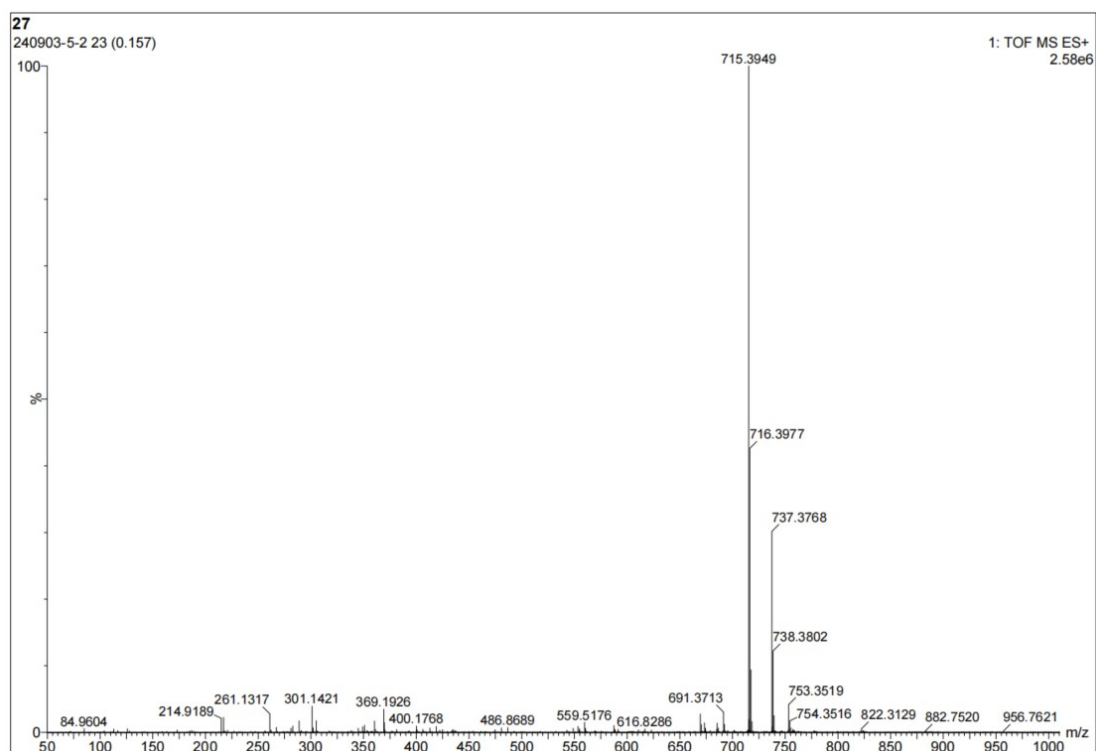

Fig. S25 HRMS spectra of **E2**

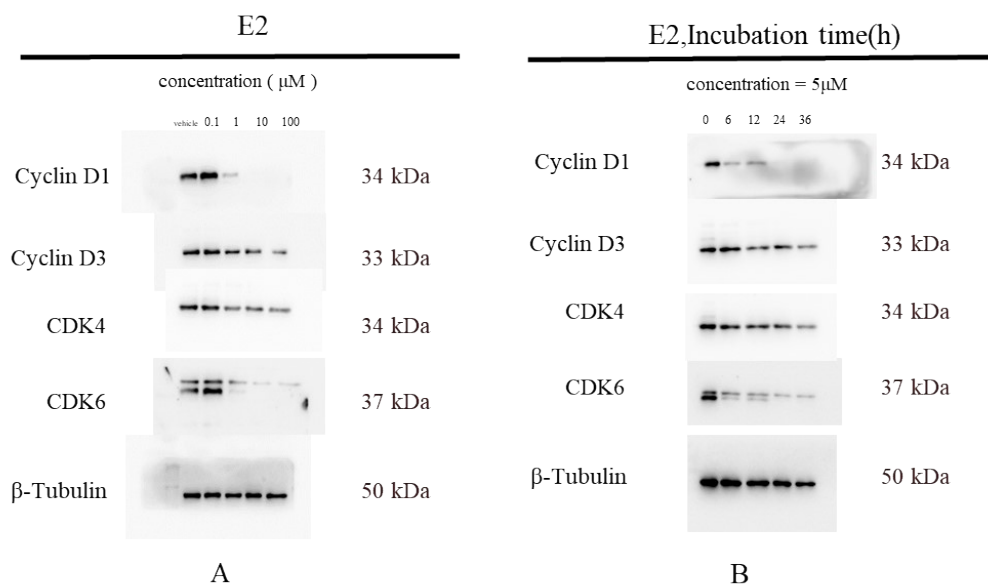

Fig. S26 The raw images of Western blot. Expression of Cyclin D1/3 and CDK4/6 in T47D cells following **E2** treatment. A) Changes in protein expression with different **E2** concentrations; B) Protein expression levels at various time intervals after treatment with 5  $\mu$ M **E2**.

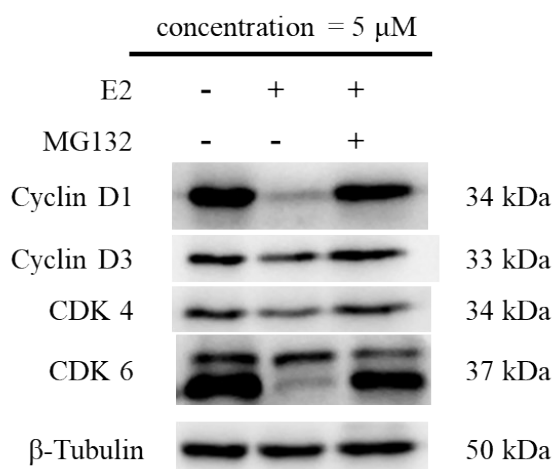

Fig. S27 The raw images of Western blot. Expression of Cyclin D1/3 and CDK4/6 in T47D cells after treatment with 5  $\mu$ M **E2** alone or in combination with MG132. (New)
